# Supplementary material for: Rational design of a modular mRNA vaccine platform for rapid adaptation to SARS-CoV-2 variants
Source: Sci Rep. 2026 Jun 3;16:17178. doi: 10.1038/s41598-026-48481-8 (PMC13234338; doi:10.1038/s41598-026-48481-8)
Supplement: Supplementary file 1 — Supplementary Material 1 [file 41598_2026_48481_MOESM1_ESM.xlsx]

## Sheet: Sheet1
Table S1 The sequence of SARS-CoV-2 mRNA vaccine candidates
Element	TP2A	TPOM	XBB-6P	Fluc
5'UTR	AGGGGTTTCTTGCTGCAGCAACGCGAGTGGGAGCACCAGGATCTCGGGCTCGGAACGAGACTGCACGGATTGTTTTAAGAAAGCCACC	AGGGGTTTCTTGCTGCAGCAACGCGAGTGGGAGCACCAGGATCTCGGGCTCGGAACGAGACTGCACGGATTGTTTTAAGAAAGCCACC	AGGGGACTTGGAGGCAGAGACCCAAGCAGCTGGAGGCTCTGTGTGTGGGAGCAGCGACTGGACCCAGAGCCACC	AGGGGTTTCTTGCTGCAGCAACGCGAGTGGGAGCACCAGGATCTCGGGCTCGGAACGAGACTGCACGGATTGTTTTAAGAAAGCCACC
ORF	ATGGTGCAATGAAGAGAGGGCTCTGCTGTGTGCTGCTGCTGTGTGGAGCAGTCTTCGTTTCGCCCAGAGTCCAACCAACAGAATCTATTGTTAGATTTCCTAATATTACAAACTTGTGCCCTTTTGGTGAAGTTTTTAACGCCACCAGATTTGCATCTGTTTATGCTTGGAACAGGAAGAGAATCAGCAACTGTGTTGCTGATTATTCTGTCCTATATAATTCCGCATCATTTTCCACTTTTAAGTGTTATGGAGTGTCTCCTACTAAATTAAATGATCTCTGCTTTACTAATGTCTATGCAGATTCATTTGTAATTAGAGGTGATGAAGTCAGACAAATCGCTCCAGGGCAAACTGGAAAGATTGCTGATTATAATTATAAATTACCAGATGATTTTA…	ATGGATGCAATGAAGAGAGGGCTCTGCTGTGTGCTGCTGCTGTGTGGAGCAGTCTTCGTTTCGCCCCCATTTTTGGATGTTTACCAAAAAAACAACAAAAGTTGGATGGAAAGTGAGTTCAGAGTTTATTCTAGTGCGAATAATTG CACTTTTGAATATGTCTCTCAGCCTTTTCTTATGGACCTTGAAGGAAAAGAGGGTAATTTCAAAAATCTTAGGGAATTTG TGTTTAAGAATATTGATGGTTATTTTAAAATATATTCTAAGCACACGCCTATTAATTTAGAGCGTGATCTCCCTCAGGGT TTTTCGGCTTTAGAACCATTGGTAGATTTGCCAATAGGTATTAACATCACTAGGTTTCAAACTTTACTTGCTTTACATAG AAGTTATTT…	ATGTTTGTTTTTCTTGTTTTATTGCCACTAGTCTCTAGTCAGTGTGTTAATCTTA TAACCAGAACTCAATCATACACTAATTCTTTCACACGTGGTGTTTATTACCCTGACAAAGTTTTCAGATCCTCAGTTTTA CATTCAACTCAGGACTTGTTCTTACCTTTCTTTTCCAATGTTACTTGGTTCCATGCTATACATGTCTCTGGGACCAATGG TACTAAGAGGTTTGATAACCCTGCCCTACCATTTAATGATGGTGTTTATTTTGCTTCCACTGAGAAGTCTAACATAATAA GAGGCTGGATTTTTGGTACTACTTTAGATTCGAAGACCCAGTCCCTACTTATTGTTAATAACGCTACTAATGTTGTTATT AAAGTCTGTGAATTTCAAT…	ATGGAAGACGCCAAGAATATAAAGAAAGGCCCTGCACCCTTCTACCCCCTAGAGGACGGCACCGCAGGAGAGCAGCTGCACAAAGCAATGAAAAGGTATGCCCTGGTGCCAGGAACGATTGCCTTCACTGATGCCCACATTGAGGTTGATATTACCTATGCAGAGTACTTCGAGATGTCAGTACGCCTAGCCGAGGCCATGAAGAGATATGGTCTGAACACAAACCACCGGATCGTCGTCTGCTCAGAAAATTCTCTGCAGTTCTTCATGCCTGTGCTGGGAGCGTTATTCATTGGTGTAGCTGTGGCACCTGCCAATGACATCTACAATGAGAGAGAATTGCTAAACAGCATGGGCATTAGTCAGCCCACTGTGGTTTTCGTGTCTAAAAAAGGGCTT…
3'UTR	GATCCTGGAGGATTTCCTCCTCTTCGAGTCGCCGGTCGGTTCTCCGTAAATCGTGGCA	GATCCTGGAGGATTTCCTCCTCTTCGAGTCGCCGGTCGGTTCTCCGTAAATCGTGGCA	GATCCTGGAGGATTTCCTCCTCTTCGAGTCGCCGGTCGGTTCTCCGTAAATCGTGGCA	GATCCTGGAGGATTTCCTCCTCTTCGAGTCGCCGGTCGGTTCTCCGTAAATCGTGGCA
Ploy(A)	AAAAAAAAAAAAAAAAAAAAAAAAAAAAAAGCATATGACTAAAAAAAAAAAAAAAAAAAAAAAAAAAAAAAAAAAAAAAAAAAAAAAAAAAAAAAAAAAAAAAAAAAAAA	AAAAAAAAAAAAAAAAAAAAAAAAAAAAAAGCATATGACTAAAAAAAAAAAAAAAAAAAAAAAAAAAAAAAAAAAAAAAAAAAAAAAAAAAAAAAAAAAAAAAAAAAAAA	AAAAAAAAAAAAAAAAAAAAAAAAAAAAAAAGCATATGACTAAAAAAAAAAAAAAAAAAAAAAAAAAAAAAAAAAAAAAAAAAAAAAAAAAAAAAAAAAAAAAAAAAAAA	AAAAAAAAAAAAAAAAAAAAAAAAAAAAAAGCATATGACTAAAAAAAAAAAAAAAAAAAAAAAAAAAAAAAAAAAAAAAAAAAAAAAAAAAAAAAAAAAAAAAAAAAAAA
